# Supplementary material for: Quantitative analysis of peripheral retinal defocus checked by multispectral refraction topography in myopia among youth
Source: PubMed Central journal article supplement — Chin Med J (Engl). 2023 Feb 27;136(4):476–8. doi: 10.1097/CM9.0000000000002606 (PMC10106179; doi:10.1097/cm9.0000000000002606), 2023-02-27
Supplement: cm9-136-476-s001.pdf [file cm9-136-476-s001.pdf]

**Supplementary Table 1: Baseline characteristics of the participants of four groups.**

| Characteristics | EM         | LM         | MM         | HM         |
|-----------------|------------|------------|------------|------------|
| Gender(F/M)     | 35/39      | 140/106    | 63/59      | 34/36      |
| Age (years)     | 9.6±1.9    | 10.0±2.3   | 11.7±2.2   | 13.0±2.9   |
| AL (mm)         | 23.66±0.89 | 24.26±0.76 | 25.10±0.94 | 26.66±0.94 |

EM: Emmetropia; LM: Low myopia; MM: Middle myopia; HM: High myopia; AL: Axial length.

**Supplementary Table 2: The RDV in different eccentricities and quadrants of four groups.**

| Characteristics | Group | Mean   | SD    |
|-----------------|-------|--------|-------|
| TRDV            | EM    | 0.006  | 0.503 |
|                 | LM    | 0.040  | 0.533 |
|                 | MM    | 0.223  | 0.475 |
|                 | HM    | 0.183  | 0.457 |
| RDV-15          | EM    | -0.073 | 0.065 |
|                 | LM    | -0.043 | 0.109 |
|                 | MM    | -0.061 | 0.076 |
|                 | HM    | -0.010 | 0.176 |
| RDV-30          | EM    | -0.102 | 0.199 |
|                 | LM    | -0.040 | 0.240 |
|                 | MM    | -0.019 | 0.194 |
|                 | HM    | -0.038 | 0.242 |
| RDV-45          | EM    | -0.013 | 0.396 |
|                 | LM    | 0.056  | 0.414 |
|                 | MM    | 0.168  | 0.381 |
|                 | HM    | 0.143  | 0.383 |
| RDV-S           | EM    | -0.715 | 0.755 |
|                 | LM    | -0.491 | 0.852 |
|                 | MM    | -0.346 | 0.818 |
|                 | HM    | -0.075 | 0.978 |
| RDV-I           | EM    | 0.363  | 0.664 |
|                 | LM    | 0.198  | 0.940 |
|                 | MM    | 0.449  | 0.639 |
|                 | HM    | 0.293  | 0.479 |
| RDV-T           | EM    | 0.012  | 0.679 |
|                 | LM    | 0.163  | 0.740 |
|                 | MM    | 0.247  | 0.698 |
|                 | HM    | 0.192  | 0.771 |

|       |    |       |       |
|-------|----|-------|-------|
| RDV-N | EM | 0.192 | 0.781 |
|       | LM | 0.336 | 0.763 |
|       | MM | 0.566 | 0.710 |
|       | HM | 0.362 | 0.605 |

EM: Emmetropia; LM: Low myopia; MM: Middle myopia; HM: High myopia;  
TRDV: Total refraction difference value; RDV: Refraction difference value; RDV-N:  
RDV-nasal; RDV-T: RDV-temporal; RDV-S: RDV-superior; RDV-I: RDV-inferior;  
SD: Standard deviation.

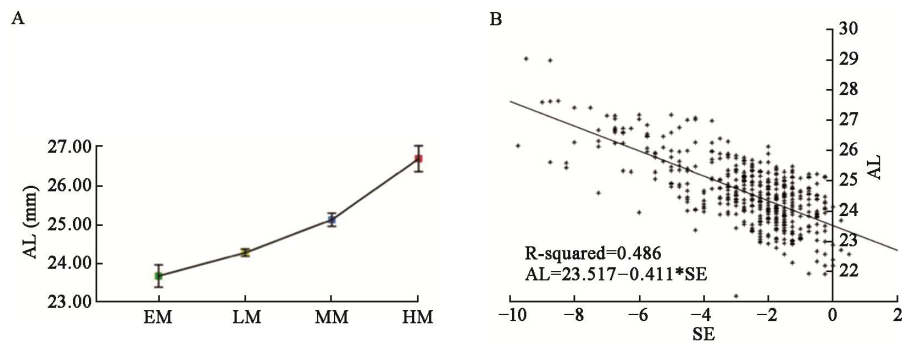

**Supplementary Figure 1:** The results also presented there was a significant difference in AL between four groups (A). The Pearson correlation analysis indicated an obvious negative correlation of SE with AL ( $r = -0.697$ ,  $P < 0.05$ ) (B). AL: Axial length.
